# Supplementary material
Source: PubMed Central journal article supplement (PMC5897179)
Supplement: NIHMS913340-supplement-Supp_info.pdf [file NIHMS913340-supplement-Supp_info.pdf]

Supplementary Figure 1: Overall survival of patients from HCC development

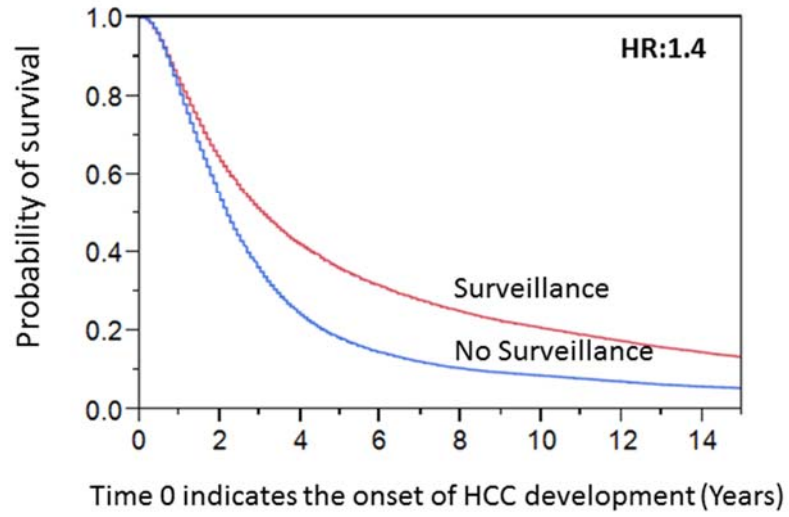

Supplementary Figure 2: Overall survival of patients from HCC diagnosis

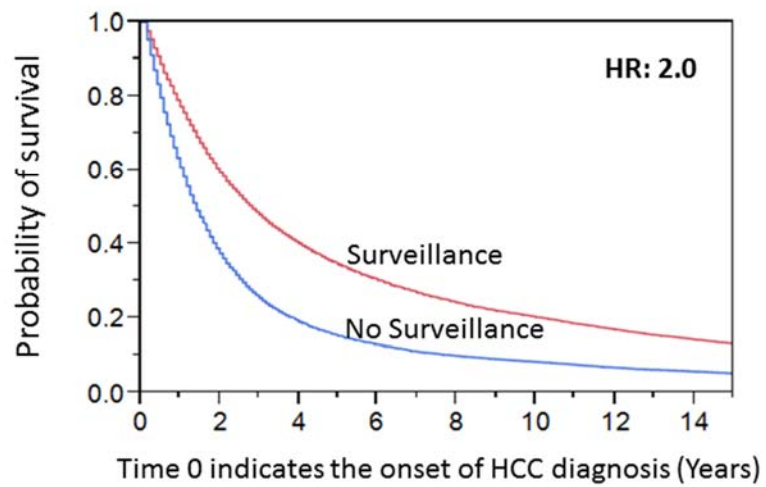

Supplementary Figure 3. One way sensitivity analysis: Impact of HCC surveillance on Relative Risk Reduction of HCC mortality

### Relative Reduction of HCC-Specific Death

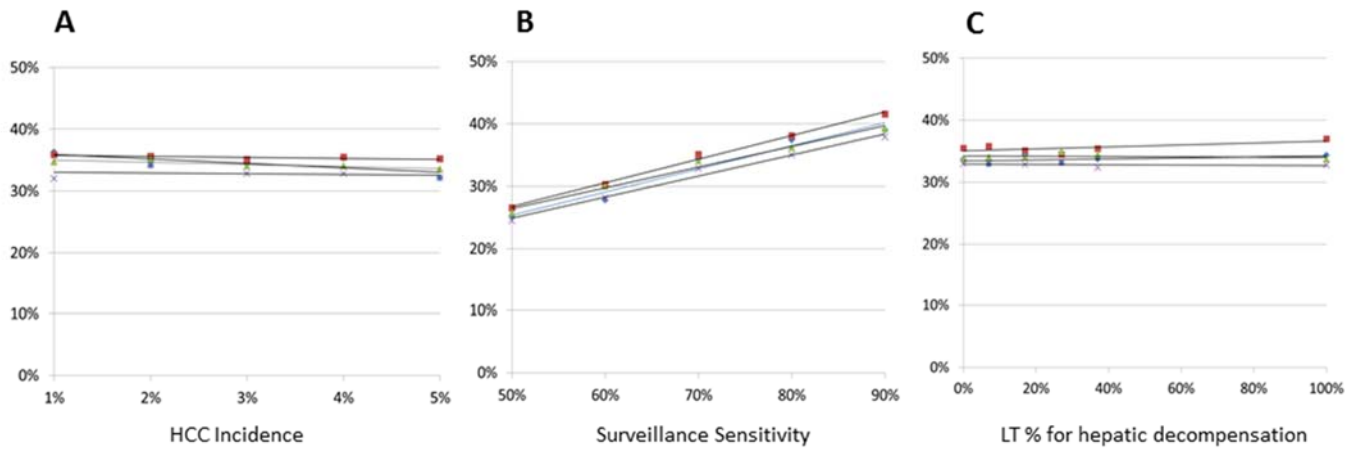

Blue diamond- 3 year; Red square- 5 year; Green triangle-10 year; Violet X -15 year

A: HCC incidence and relative risk reduction of HCC specific mortality from HCC surveillance (X axis- annual incidence of HCC, Y axis-relative risk reduction of HCC mortality)

B: Surveillance test sensitivity and relative risk reduction of HCC specific mortality from HCC surveillance (X axis- surveillance sensitivity of HCC detection, Y axis-relative risk reduction of HCC mortality)

C: Rate of rescue transplant for hepatic decompensation and relative risk reduction of HCC specific mortality from HCC surveillance (X axis- Percent of rescue transplant for hepatic decompensation, Y axis-relative risk reduction of HCC mortality)

Supplementary Figure 4. One way sensitivity analysis: Impact of HCC surveillance on Relative Risk Reduction of All-cause mortality

### Relative Reduction of All-Cause Death

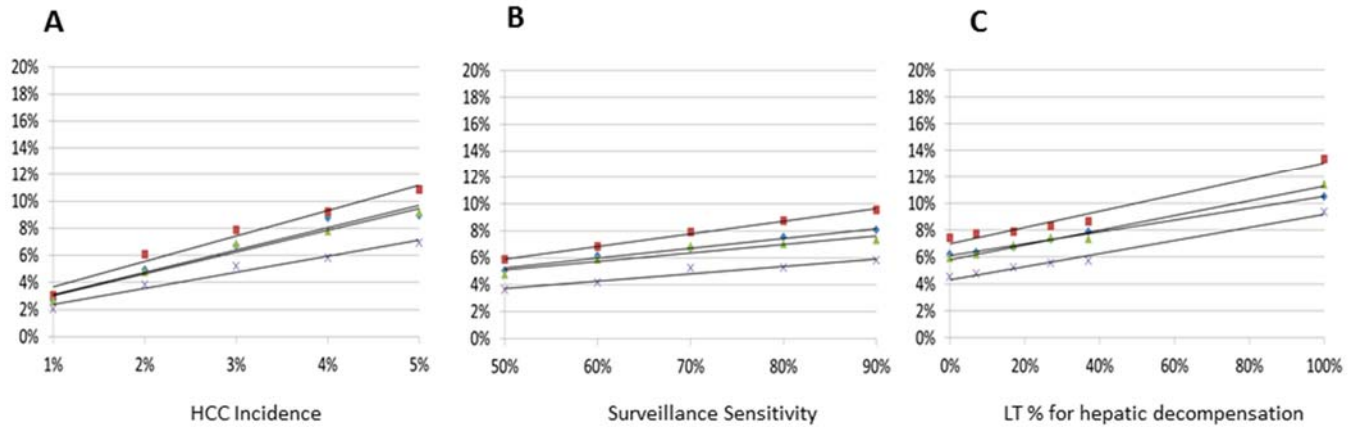

Blue diamond- 3 year; Red square- 5 year; Green triangle-10 year; Violet X -15 year

A: HCC incidence and relative risk reduction of all cause mortality from HCC surveillance (X axis- annual incidence of HCC, Y axis-relative risk reduction of all cause mortality)

B: Surveillance test sensitivity and relative risk reduction of all cause mortality from HCC surveillance (X axis- surveillance sensitivity of HCC detection, Y axis-relative risk reduction of all cause mortality)

C: Rate of rescue transplant for hepatic decompensation and relative risk reduction of all cause mortality from HCC surveillance (X axis- Percent of rescue transplant for hepatic decompensation, Y axis-relative risk reduction of all cause mortality)

## Supplementary Figure 5. The probabilistic sensitivity analysis

Relative Risk Reduction for All-Cause Mortality

Relative Risk Reduction for HCC-Specific Mortality

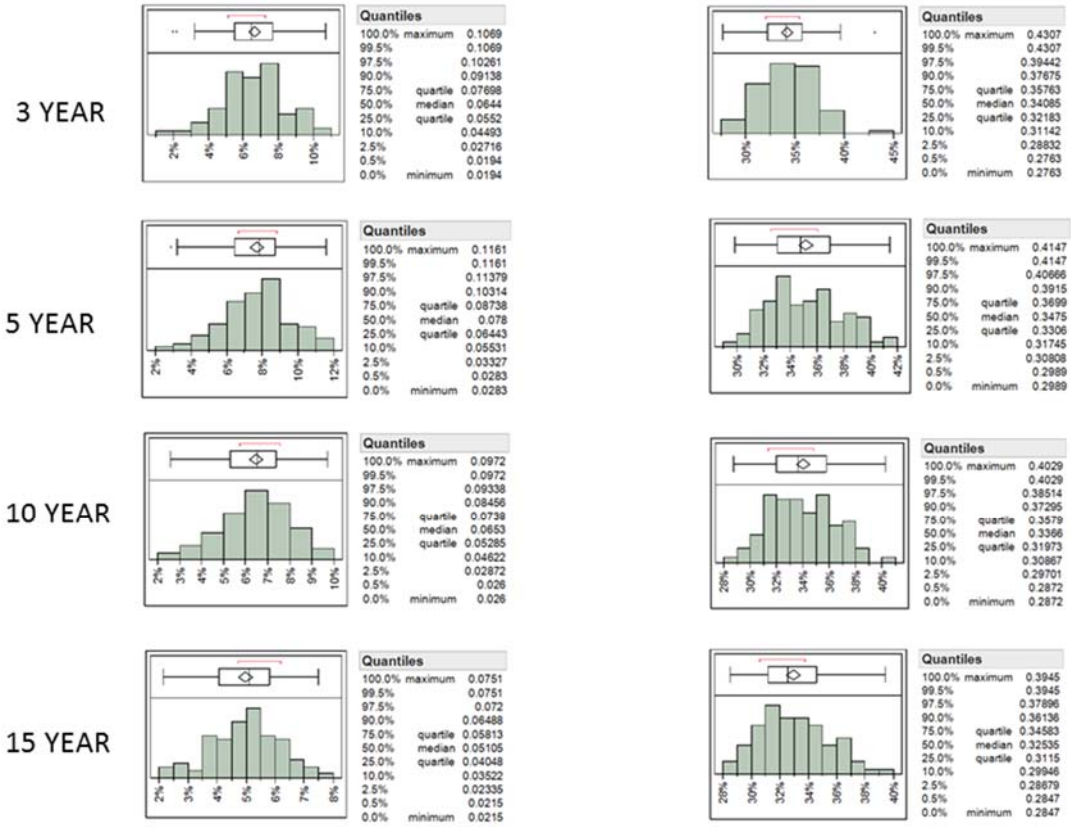

Supplementary Tables 1: Two way Sensitivity analysis: Effect of non-progression of cirrhosis stage and reduced incidence rate of HCC to 1%

|                 | Mortality |      | NNS     |     | Relative Risk Reduction |       |
|-----------------|-----------|------|---------|-----|-------------------------|-------|
|                 | Overall   | HCC  | Overall | HCC | Overall                 | HCC   |
| <b>3 years</b>  |           |      | 340     | 267 | 4.8%                    | 35.4% |
| No Surveillance | 6.1%      | 1.1% |         |     |                         |       |
| Surveillance    | 5.8%      | 0.7% |         |     |                         |       |
| <b>5 years</b>  |           |      | 137     | 116 | 7.0%                    | 36.4% |
| No Surveillance | 10.3%     | 2.4% |         |     |                         |       |
| Surveillance    | 9.6%      | 1.5% |         |     |                         |       |
| <b>10 years</b> |           |      | 61      | 50  | 7.6%                    | 35.3% |
| No Surveillance | 21.4%     | 5.7% |         |     |                         |       |
| Surveillance    | 19.8%     | 3.7% |         |     |                         |       |
| <b>15 years</b> |           |      | 44      | 34  | 7.2%                    | 34.6% |
| No Surveillance | 31.2%     | 8.5% |         |     |                         |       |
| Surveillance    | 28.9%     | 5.6% |         |     |                         |       |

HCC- hepatocellular carcinoma; LTx- liver transplant; NNS- number needed to be surveillance (in comparison to no surveillance); RFA- radiofrequency ablation

Supplementary Tables 2: Effect of HCC incidence on All-cause and HCC-specific mortality with/without surveillance

|                 | 3 Year Mortality |      | 5 Year Mortality |       | 10 Year Mortality |       | 15 Year Mortality |       |
|-----------------|------------------|------|------------------|-------|-------------------|-------|-------------------|-------|
|                 | All              | HCC  | All              | HCC   | All               | HCC   | All               | HCC   |
| <b>1%</b>       |                  |      |                  |       |                   |       |                   |       |
| No Surveillance | 10.6%            | 0.9% | 20.1%            | 2.1%  | 44.0%             | 4.6%  | 61.8%             | 6.2%  |
| Surveillance    | 10.3%            | 0.6% | 19.4%            | 1.3%  | 42.9%             | 3.0%  | 60.6%             | 4.2%  |
| <b>2%</b>       |                  |      |                  |       |                   |       |                   |       |
| No Surveillance | 11.3%            | 2.0% | 22.2%            | 4.3%  | 47.9%             | 9.1%  | 65.7%             | 12.0% |
| Surveillance    | 10.8%            | 1.3% | 20.8%            | 2.8%  | 45.6%             | 5.9%  | 63.2%             | 7.9%  |
| <b>4%</b>       |                  |      |                  |       |                   |       |                   |       |
| No Surveillance | 13.4%            | 4.0% | 25.6%            | 8.4%  | 53.6%             | 17.3% | 71.3%             | 22.1% |
| Surveillance    | 12.2%            | 2.6% | 23.2%            | 5.4%  | 49.4%             | 11.4% | 67.2%             | 14.8% |
| <b>5%</b>       |                  |      |                  |       |                   |       |                   |       |
| No Surveillance | 14.3%            | 4.8% | 27.7%            | 10.1% | 56.6%             | 20.8% | 73.9%             | 26.3% |
| Surveillance    | 13.1%            | 3.2% | 24.7%            | 6.5%  | 51.4%             | 13.8% | 68.7%             | 17.8% |

Supplementary Tables 3: Effect of Surveillance test sensitivity on All-cause and HCC-specific mortality with/without surveillance

|                 | 3 Year Mortality |      | 5 Year Mortality |      | 10 Year Mortality |       | 15 Year Mortality |       |
|-----------------|------------------|------|------------------|------|-------------------|-------|-------------------|-------|
|                 | All              | HCC  | All              | HCC  | All               | HCC   | All               | HCC   |
| No Surveillance | 12.3%            | 2.9% | 23.5%            | 6.2% | 50.2%             | 13.1% | 68.2%             | 17.1% |
| Surveillance    |                  |      |                  |      |                   |       |                   |       |
| <b>50%</b>      | 12.0%            | 2.3% | 22.5%            | 4.7% | 48.5%             | 9.9%  | 66.2%             | 12.9% |
| <b>60%</b>      | 12.0%            | 2.2% | 22.7%            | 4.5% | 48.1%             | 9.2%  | 65.6%             | 12.2% |
| <b>80%</b>      | 11.3%            | 1.8% | 21.8%            | 4.0% | 47.4%             | 8.6%  | 64.9%             | 11.3% |
| <b>90%</b>      | 11.4%            | 1.8% | 21.9%            | 3.7% | 46.9%             | 7.9%  | 64.3%             | 10.5% |

Supplementary Tables 4: Sensitivity analysis: Liver transplantation unavailable at all

|                 | Mortality |       | NNS     |     | Relative Risk Reduction |       |
|-----------------|-----------|-------|---------|-----|-------------------------|-------|
|                 | Overall   | HCC   | Overall | HCC | Overall                 | HCC   |
|                 |           |       |         |     |                         |       |
| <b>3 years</b>  |           |       | 123     | 101 | 6.2%                    | 34.6% |
| No Surveillance | 13.1%     | 2.9%  |         |     |                         |       |
| Surveillance    | 12.3%     | 1.9%  |         |     |                         |       |
| <b>5 years</b>  |           |       | 56      | 46  | 7.1%                    | 35.6% |
| No Surveillance | 25.1%     | 6.2%  |         |     |                         |       |
| Surveillance    | 23.3%     | 4.0%  |         |     |                         |       |
| <b>10 years</b> |           |       | 34      | 22  | 5.5%                    | 34.0% |
| No Surveillance | 53.8%     | 13.1% |         |     |                         |       |
| Surveillance    | 50.8%     | 8.7%  |         |     |                         |       |
| <b>15 years</b> |           |       | 35      | 18  | 3.9%                    | 32.6% |
| No Surveillance | 73.1%     | 17.1% |         |     |                         |       |
| Surveillance    | 70.3%     | 11.5% |         |     |                         |       |

HCC- hepatocellular carcinoma; LTx- liver transplant; NNS- number needed to be surveillance (in comparison to no surveillance); RFA- radiofrequency ablation

Supplementary Tables 5: Effect of rescue transplant for hepatic decompensation on All-cause and HCC-specific mortality with/without surveillance

|                 | 3 Year Mortality |      | 5 Year Mortality |      | 10 Year Mortality |       | 15 Year Mortality |       |
|-----------------|------------------|------|------------------|------|-------------------|-------|-------------------|-------|
|                 | All              | HCC  | All              | HCC  | All               | HCC   | All               | HCC   |
| <b>0%</b>       |                  |      |                  |      |                   |       |                   |       |
| No Surveillance | 13.0%            | 2.9% | 25.7%            | 6.4% | 54.3%             | 13.4% | 72.8%             | 17.4% |
| Surveillance    | 12.2%            | 1.9% | 23.8%            | 4.1% | 51.0%             | 8.9%  | 69.5%             | 11.6% |
| <b>27%</b>      |                  |      |                  |      |                   |       |                   |       |
| No Surveillance | 12.0%            | 3.0% | 23.2%            | 6.4% | 48.9%             | 13.2% | 65.8%             | 17.1% |
| Surveillance    | 11.2%            | 2.0% | 21.3%            | 4.2% | 45.3%             | 8.6%  | 62.2%             | 11.4% |
| <b>37%</b>      |                  |      |                  |      |                   |       |                   |       |
| No Surveillance | 11.6%            | 3.0% | 22.3%            | 6.4% | 46.9%             | 13.4% | 63.2%             | 17.3% |
| Surveillance    | 10.7%            | 2.0% | 20.4%            | 4.1% | 43.4%             | 8.8%  | 59.6%             | 11.7% |
| <b>100%</b>     |                  |      |                  |      |                   |       |                   |       |
| No Surveillance | 8.6%             | 2.9% | 16.0%            | 6.2% | 33.6%             | 13.1% | 46.6%             | 17.0% |
| Surveillance    | 7.7%             | 1.9% | 13.9%            | 3.9% | 29.8%             | 8.7%  | 42.2%             | 11.4% |
